# Supplementary material
Source: Elsevier journal article supplement (https://www.sciencedirect.com/science/article/pii/S0014256522000704)
Supplement: mmc1 [file S0014256522000704:mmc1.pdf]

---

**CUESTIONARIO DE EVALUACIÓN DE CONOCIMIENTOS EN INSUFICIENCIA CARDIACA (CECIC)**

---

NOMBRE:

NHC

FECHA:

Núm. Test: 0 (alta) / 1 (Individual) / 2 (grupal) / 3 (refuerzo) / ... (...)

---

**-----Conocimiento enfermedad**

---

1. Le han dicho que tiene INSUFICIENCIA CARDÍACA. Eso quiere decir que:

- a) Tiene el corazón más grande que la caja y aplasta los pulmones.
  - b) El corazón no puede bombear suficiente sangre como necesita el organismo.
  - c) El riñón no elimina suficiente líquido y me hincho.
  - d) El problema está en los pulmones que no funcionan bien.
- 

2. ¿Cuáles son las principales CAUSAS de la insuficiencia cardíaca?

- a) El infarto de miocardio, la presión arterial alta y cierta predisposición familiar.
  - b) Problemas pulmonares y la alergia.
  - c) Obesidad y diabetes.
  - d) Resfriados mal curados.
- 

3. Con la insuficiencia cardíaca, puede tener DIFICULTAD PARA RESPIRAR por:

- a) exceso de líquido en los pulmones (“pulmones encharcados”).
  - b) porque tengo los bronquios mal.
  - c) tengo nervios y me da ansiedad.
  - d) no descanso lo suficiente.
- 

4. ¿Cuál crees que es el PRINCIPAL DESCOMPENSANTE de los síntomas de la insuficiencia cardíaca, y nos debe poner en alerta?

- a) Una dieta alta en grasas.
  - b) Un resfriado o la gripe.
  - c) La falta de ejercicio.
  - d) Tomar regularmente la medicación del corazón.
-

---

## ----- Signos de alarma

---

5. ¿Cómo CONTROLA SU PESO?

- a) Semanalmente para comprobar que no engordo.
  - b) De vez en cuando, porque siempre peso lo mismo.
  - c) Cada día, antes de vestirme, por si retengo líquidos.
  - d) No lo hago porque no lo veo importante.
- 

6. ¿Cuál de las siguientes situaciones NO ASOCIA con una DESCOMPENSACIÓN CARDÍACA?

- a) Hinchazón de pies y piernas.
  - b) Perder peso.
  - c) Aumento de la tos y dificultad para respirar al acostarse.
  - d) Malestar general y cansancio.
- 

7. ¿Cómo controla su PRESIÓN ARTERIAL y la FRECUENCIA CARDÍACA?

- a) Unos días antes de venir a la consulta, para que la vea el médico.
  - b) Rara vez, siempre la tengo bien.
  - c) Todos los días y varias veces porque así me lo han dicho.
  - d) Regularmente para vigilar el efecto de la medicación.
- 

8. ¿Cuál de las siguientes situaciones le ALERTAN de posible descompensación?

- a) Una presión arterial sistólica ("la alta") entre 100 y 140 mmHg.
  - b) Una frecuencia cardíaca entre 50 y 100 lpm.
  - c) Un aumento de peso de 1 kilo al día o 2 kilos en 2 o 3 días consecutivos.
  - d) Una tensión arterial diastólica ("la baja") menor de 60 mmHg.
- 

9. ¿Qué es LO MEJOR que puede hacer en caso de aparición de señales de alarma de descompensación?

- a) Llamo al médico o a la enfermera.
  - b) Espero hasta la próxima cita.
  - c) Tomo menos medicamento.
  - d) Acudo a urgencias lo antes posible, aunque la descompensación sea leve.
-

---

## **Dieta**

---

10. Respecto a la INGESTA DIARIA DE LÍQUIDOS (zumos, sopas, agua):

- a) es bueno una ingesta abundante de líquidos para proteger el riñón.
  - b) bebo muy poco para evitar la retención de líquidos.
  - c) no controlo porque no creo que sea importante.
  - d) es aconsejable moderar la ingesta de líquidos de 1,5 a 2,5 litros como máximo.
- 

11. En una DIETA CARDIOSALUDABLE, baja en grasas y pobre en sal, es útil:

- a) comprar comidas ya preparadas y alimentos enlatados, más saludables.
  - b) sustituir la sal normal por otras sales de farmacia sin sodio.
  - c) consumo moderado de embutidos, mantequilla y margarinas con sal.
  - d) aumentar la ingesta de frutas, verduras y legumbres.
- 

12. ¿Cuál de estos comportamientos PERJUDICA a su corazón?

- a) Evitar el consumo de alcohol, el café y las bebidas gaseosas.
  - b) Suprimir el tabaco.
  - c) No controlar el sobrepeso.
  - d) Hacer ejercicio de forma habitual como andar, nadar e ir en bicicleta.
- 

13. ¿Por qué alguien con insuficiencia cardíaca debe seguir una dieta baja en sal?

- a) La sal promueve la retención de líquidos.
  - b) La sal causa constricción de los vasos sanguíneos.
  - c) La sal aumenta la frecuencia cardíaca.
  - d) La sal interfiere con la acción de los medicamentos.
- 

---

## **Ejercicio**

---

14. El EJERCICIO FÍSICO como andar, nadar o la bicicleta suave, pueden producir todos los siguientes efectos, EXCEPTO:

- a) puede agravar los síntomas de la enfermedad.
  - b) ayuda a perder peso.
  - c) ayuda a reducir los niveles de colesterol.
  - d) mejora su fuerza muscular.
-

---

15. ¿Cuál de los siguientes NO ES ADECUADO al realizar EJERCICIO?

- a) Iniciar el ejercicio de forma progresiva con una actividad que resulte cómoda.
  - b) Realizar ejercicio con temperaturas extremas.
  - c) Realizar al menos 30 minutos cada día, la mayoría de los días de la semana.
  - d) Beber algo de agua antes de empezar y al finalizar el ejercicio.
- 

-----**Tratamiento**

---

16. Si aumento más de 1 kg de peso en un día o más de 2 kg en 2 o 3 días TENGO QUE:

- a) disminuir la comida unos días.
  - b) aumentar la ingesta de líquidos.
  - c) disminuir las pastillas de orinar (“diuréticos”).
  - c) aumentar las pastillas de orinar (“diuréticos”).
- 

---

17. ¿Qué medicamentos para el corazón PUEDEN BAJAR LA TENSIÓN?

- a) Pastillas de orinar (“diuréticos”): seguril o furosemida, eplerenona, espironolactona o aldactone.
  - b) Pastillas que frenan el corazón (“betabloqueantes”): bisoprolol, carvedilol, nebivolol.
  - c) Pastillas reguladoras de la presión sanguínea (“IECAs o ARAII”): ramipril, enalapril, losartán, valsartán, entresto, neparvis...
  - d) Todas las anteriores.
- 

---

18. Los medicamentos que toma para el corazón SIRVEN para todo lo siguiente, EXCEPTO:

- a) Disminuir la fatiga física, mejorar la respiración y la irrigación de los tejidos.
  - b) Reducir las probabilidades de que usted necesite ingresar.
  - c) Evitar que engorde.
  - d) Hacer que usted viva más tiempo.
-

---

19. Que el paciente debe ser RESPONSABLE DE SU CUIDADO significa todo lo siguiente MENOS:

- a) debe conocer su medicación y tomarla a diario.
  - b) realizar un estilo de vida saludable: dieta, ejercicio, no tabaco...
  - c) contactar con su médico o enfermera si detecta que empeora.
  - d) cuando se encuentra mejor, puede dejar de tomar la medicación para la insuficiencia cardíaca.
- 

20. ¿Cuál de las siguientes afirmaciones considera INCORRECTA?

- a) La insuficiencia cardíaca es una enfermedad crónica, lo que significa que hay épocas en las que se encontrará mejor y otras en las que puede empeorar.
  - b) Le irán aumentando la dosis de algún medicamento, aunque usted se encuentre bien, porque este es el tratamiento adecuado para usted.
  - c) Los medicamentos pueden provocar efectos secundarios, sobre todo al inicio, por lo que debe comunicarlo al equipo sanitario.
  - d) No es necesario aportar la medicación ni los controles de tensión y pulso en cada visita a la consulta, porque ya está en los informes.
- 

21. De los siguientes grupos de fármacos, todos han demostrado prolongar la vida y mejorar la función del corazón, MENOS:

- a) diuréticos: furosemida, torasemida, clortalidona, hidroclorotiazida...
- b) IECA/ARA II/ARNI: ramipril, enalapril, candesartan, losartan, sacubitril-valsartan...
- c) betabloqueantes: carvedilol, bisoprolol, nebivolol, metoprolol...
- d) antialdosternónicos: espironolactona, eplerrenona...
